# Supplementary material for: Cerebral Blood Flow Velocity Modulation and Clinical Efficacy of Acupuncture for Posterior Circulation Infarction Vertigo: A Systematic Review and Meta-Analysis
Source: Evid Based Complement Alternat Med. 2022 Jun 28;2022:3740856. doi: 10.1155/2022/3740856 (PMC9256413; doi:10.1155/2022/3740856)
Supplement: Supplementary Materials — Supplementary Table S1 provides the search terms and search strategy of this study. Supplementary Table S2 shows the number of articles in each database. PRISMA 2020 Checklist contains the checklist items of a systematic review, including the title, abstract, introduction, methods, results, and discussion. [file 3740856.f1.zip]

Archive with 3 entries (3 files):
- 3740856.f1/PRISMA_2020checklist (2).docx
- 3740856.f1/Supplemental Table S1. Search strategy.docx
- 3740856.f1/Supplemental Table S2. Number of articles in each database.docx
